# Supplementary material
Source: publisher figshare collection journal article supplement (https://frontiersin.figshare.com/ndownloader/files/13113860)
Supplement: Supplementary file [file 13113860]

样品名称: BW4482-18-2

=====

操作者 : asp 序列行 : 9  
仪器 : 仪器 1 位置 : 样品瓶 122  
进样日期 : 2017/1/16 16:30:45 进样次数 : 1  
进样量 : 1 µl

采集方法 : C:\CHEM32\1\DATA\201701\DEF\_GC 2017-01-16 09-51-36\FID-脂肪酸HP88-NEW.M  
最后修改 : 2017/1/12 14:35:37 : asp  
分析方法 : C:\CHEM32\1\METHODS\FID-肉桂酸.M  
最后修改 : 2017/3/28 10:30:28 : asp  
(调用后修改)

附加信息: 峰已手动积分

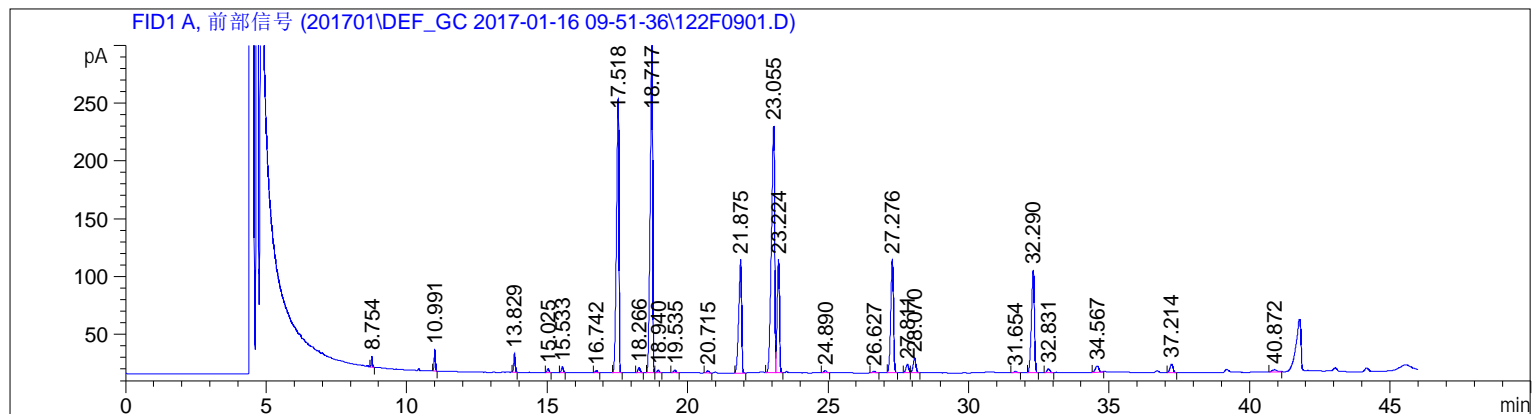

## 面积百分比报告

排序 : 信号  
乘积因子: : 1.0000  
稀释因子: : 1.0000  
内标使用乘积因子和稀释因子

信号 1: FID1 A, 前部信号

| 峰 # | 保留时间 [min] | 类型   | 峰宽 [min] | 峰面积 [pA*s] | 峰高 [pA]   | 峰面积 %    |
|-----|------------|------|----------|------------|-----------|----------|
| 1   | 8.754      | BB   | 0.0442   | 24.79550   | 9.57066   | 0.30874  |
| 2   | 10.991     | BB   | 0.0468   | 55.71205   | 18.66422  | 0.69370  |
| 3   | 13.829     | BB   | 0.0599   | 62.00231   | 16.49226  | 0.77202  |
| 4   | 15.025     | BB   | 0.0667   | 13.56209   | 3.25170   | 0.16887  |
| 5   | 15.533     | BB   | 0.0697   | 22.25452   | 5.02476   | 0.27710  |
| 6   | 16.742     | BB   | 0.0741   | 8.36910    | 1.80420   | 0.10421  |
| 7   | 17.518     | BB   | 0.0954   | 1443.45520 | 235.96468 | 17.97321 |
| 8   | 18.266     | BB   | 0.0883   | 24.63861   | 4.46954   | 0.30679  |
| 9   | 18.717     | BV   | 0.0930   | 1751.12756 | 287.58414 | 21.80420 |
| 10  | 18.940     | VB   | 0.0749   | 11.50780   | 2.44772   | 0.14329  |
| 11  | 19.535     | BB   | 0.0931   | 13.20221   | 2.29515   | 0.16439  |
| 12  | 20.715     | BB   | 0.0925   | 10.46055   | 1.73006   | 0.13025  |
| 13  | 21.875     | BB   | 0.1099   | 690.14862  | 98.33537  | 8.59340  |
| 14  | 23.055     | FM R | 0.1351   | 1731.49988 | 213.57460 | 21.55980 |
| 15  | 23.224     | VB   | 0.0895   | 550.02411  | 98.02710  | 6.84864  |
| 16  | 24.890     | BB   | 0.1024   | 13.52378   | 2.06510   | 0.16839  |
| 17  | 26.627     | BB   | 0.1083   | 11.52797   | 1.63354   | 0.14354  |
| 18  | 27.276     | BB   | 0.1045   | 658.52612  | 97.86239  | 8.19965  |

样品名称: BW4482-18-2

| 峰<br># | 保留时间<br>[min] | 类型 | 峰宽<br>[min] | 峰面积<br>[pA*s] | 峰高<br>[pA] | 峰面积<br>% |
|--------|---------------|----|-------------|---------------|------------|----------|
| 19     | 27.811        | BV | 0.1084      | 48.60561      | 7.05228    | 0.60521  |
| 20     | 28.070        | VB | 0.1064      | 85.61826      | 12.73668   | 1.06608  |
| 21     | 31.654        | BB | 0.1040      | 7.46260       | 1.17624    | 0.09292  |
| 22     | 32.290        | BB | 0.1154      | 648.51416     | 88.62286   | 8.07499  |
| 23     | 32.831        | BB | 0.1096      | 23.62213      | 3.46379    | 0.29413  |
| 24     | 34.567        | BB | 0.1361      | 45.87560      | 5.34751    | 0.57122  |
| 25     | 37.214        | BB | 0.1132      | 55.52602      | 7.60076    | 0.69138  |
| 26     | 40.872        | BB | 0.1653      | 19.58605      | 1.82407    | 0.24388  |

总量 : 8031.14842 1228.62138

=====  
\*\*\* 报告结束 \*\*\*
